# Supplementary material
Source: PubMed Central journal article supplement (PMC514950)

## Supplemental results

Figure S1. Bacterial growth assay of various *P. syringae* strains on *att1-1*.

The virulent strain DC3000 (A), incompatible strain DC3000 (*avrB*) (B), and the non-host strain *P. syringae* pv. *phaseolicola* (C) were syringe-infiltrated into the wild-type *Col-gl* (WT) and *att1-1* plants at  $10^5$  cfu/ml and leaf bacteria were measured at the indicated times. Each data point represents an average of 3 replicates.

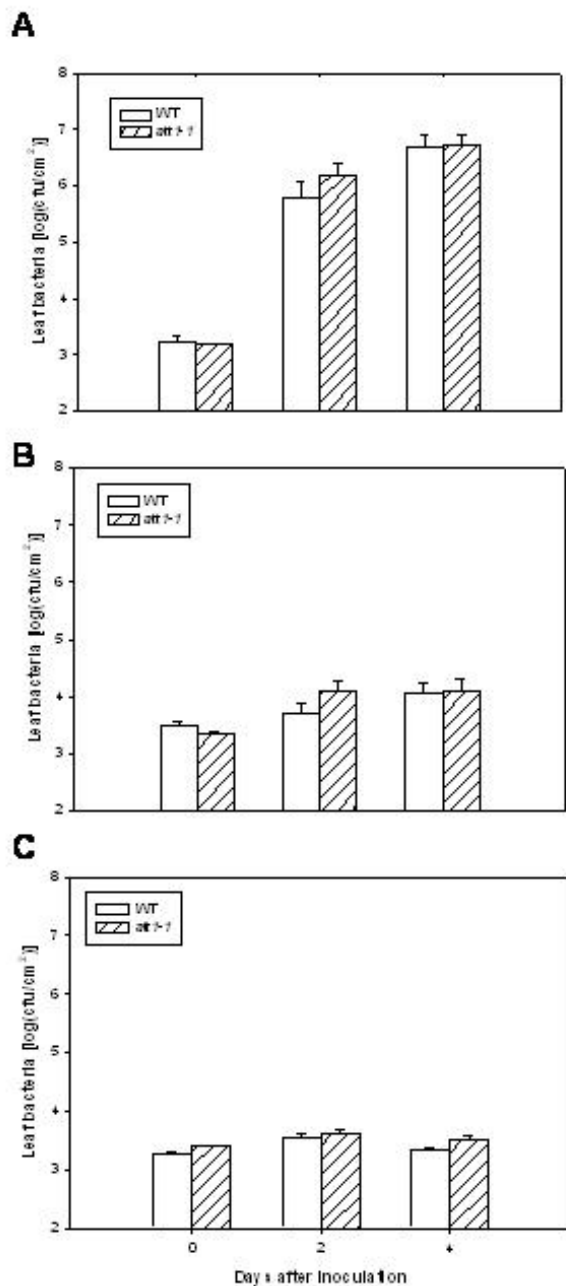

Supplement: 7600290s1.pdf [file 7600290s1.pdf]
